# Supplementary material for: Resistant Starch Alters the Microbiota-Gut Brain Axis: Implications for Dietary Modulation of Behavior
Source: PubMed Central journal article supplement (PMC4706316; doi:10.1371/journal.pone.0146406), 2016-01-08
Supplement: pone.0146406.s003.pdf [file pone.0146406.s003.pdf]

**Table S2A: Statistical significance of Shannon diversity values**

| <b>Group 1<br/>Diet/week</b> | <b>Group 2<br/>Diet/week</b> | <b>Group1<br/>mean</b> | <b>Group1<br/>std*</b> | <b>Group2<br/>mean</b> | <b>Group2<br/>std*</b> | <b>t stat**</b> | <b>p-value</b> |
|------------------------------|------------------------------|------------------------|------------------------|------------------------|------------------------|-----------------|----------------|
| NCS/3                        | NCS/1                        | 3.77786                | 0.22886                | 4.88775                | 0.5192                 | -5.86799        | 0.066          |
| NCS/6                        | NCS/1                        | 3.724333               | 0.37251                | 4.88775                | 0.5192                 | -5.46177        | 0.066          |
| NCS/6                        | NCS/3                        | 3.724333               | 0.37251                | 3.77786                | 0.2288                 | -0.36730        | 1              |
| HA7/1                        | HA7/3                        | 5.229007               | 0.27573                | 3.60795                | 0.4977                 | 8.546266        | 0.066          |
| HA7/6                        | HA7/1                        | 2.835618               | 0.68188                | 5.22900                | 0.2757                 | -9.65830        | 0.066          |
| HA7/6                        | HA7/3                        | 2.835618               | 0.68188                | 3.60795                | 0.4977                 | -2.68510        | 1              |
| OS-HA7/1                     | OS-HA7/3                     | 5.152535               | 0.67151                | 3.03713                | 0.4058                 | 8.088071        | 0.066          |
| OS-HA7/6                     | OS-HA7/1                     | 3.167414               | 0.61127                | 5.15253                | 0.6715                 | -6.55824        | 0.066          |
| OS-HA7/6                     | OS-HA7/3                     | 3.167414               | 0.61127                | 3.03713                | 0.4058                 | 0.532652        | 1              |
| HA7/1                        | NCS/1                        | 5.229007               | 0.27573                | 4.88775                | 0.5192                 | 1.741416        | 1              |
| OS-HA7/1                     | NCS/1                        | 5.152535               | 0.67151                | 4.88775                | 0.5192                 | 0.935815        | 1              |
| HA7/1                        | OS-HA7/1                     | 5.229007               | 0.27573                | 5.15253                | 0.6715                 | 0.316034        | 1              |
| HA7/3                        | NCS/3                        | 3.607959               | 0.49776                | 3.77786                | 0.2288                 | -0.93036        | 1              |
| OS-HA7/3                     | NCS/3                        | 3.037137               | 0.40585                | 3.77786                | 0.2288                 | -4.76923        | 0.066          |
| HA7/3                        | OS-HA7/3                     | 3.607959               | 0.49776                | 3.03713                | 0.4058                 | 2.66632         | 1              |
| HA7/6                        | NCS/6                        | 2.835618               | 0.68188                | 3.72433                | 0.3725                 | -3.37840        | 0.33           |
| OS-HA7/6                     | NCS/6                        | 3.167414               | 0.61127                | 3.72433                | 0.3725                 | -2.33397        | 1              |
| HA7/6                        | OS-HA7/6                     | 2.835618               | 0.68188                | 3.16741                | 0.6112                 | -1.05789        | 1              |
| OS-HA7/<br>cecal             | NCS/cecal                    | 4.192789               | 0.66901                | 3.91405                | 0.5526                 | 0.912534        | 1              |
| OS-HA7/<br>cecal             | HA7/cecal                    | 4.192789               | 0.66901                | 3.80372                | 0.4735                 | 1.359573        | 1              |
| HA7/cecal                    | NCS/cecal                    | 3.803721               | 0.47358                | 3.91405                | 0.5526                 | -0.45480        | 1              |

\*standard deviation

\*\* t test statistic

**Table S2B.** Statistical significance of observed species richness values.

| <b>Group 1<br/>Diet/week</b> | <b>Group 2<br/>Diet/week</b> | <b>Group1<br/>mean</b> | <b>Group1<br/>std*</b> | <b>Group2<br/>mean</b> | <b>Group2<br/>std*</b> | <b>t stat**</b> | <b>p-value</b> |
|------------------------------|------------------------------|------------------------|------------------------|------------------------|------------------------|-----------------|----------------|
| NCS/3                        | NCS/1                        | 127.3                  | 22.22561               | 236.7                  | 59.17093               | -5.192428       | 0.066          |
| NCS/6                        | NCS/1                        | 121.77                 | 33.40748               | 236.7                  | 59.17093               | -5.074140       | 0.066          |
| NCS/6                        | NCS/3                        | 121.77                 | 33.40748               | 127.3                  | 22.22561               | -0.413455       | 1              |
| HA7/1                        | HA7/3                        | 221.84                 | 30.33075               | 114.33                 | 22.9222                | 8.4835655       | 0.066          |
| HA7/6                        | HA7/1                        | 96.144                 | 18.5096                | 221.84                 | 30.33075               | -10.17739       | 0.066          |
| HA7/6                        | HA7/3                        | 96.144                 | 18.5096                | 114.33                 | 22.9222                | -1.787189       | 1              |
| OS-HA7/1                     | OS-HA7/3                     | 234.04                 | 55.40967               | 105.67                 | 14.78411               | 6.7153074       | 0.066          |
| OS-HA7/6                     | OS-HA7/1                     | 129.3                  | 23.10908               | 234.04                 | 55.40967               | -5.233902       | 0.066          |
| OS-HA7/6                     | OS-HA7/3                     | 129.3                  | 23.10908               | 105.67                 | 14.78411               | 2.58406         | 1              |
| HA7/1                        | NCS/1                        | 221.84                 | 30.33075               | 236.7                  | 59.1709                | -0.670458       | 1              |
| OS-HA7/1                     | NCS/1                        | 234.04                 | 55.40967               | 236.7                  | 59.17093               | -0.098440       | 1              |
| HA7/1                        | OS-HA7/1                     | 221.84                 | 30.33075               | 234.04                 | 55.40967               | -0.579407       | 1              |
| HA7/3                        | NCS/3                        | 114.33                 | 22.9222                | 127.3                  | 22.22561               | -1.218673       | 1              |
| OS-HA7/3                     | NCS/3                        | 105.67                 | 14.78411               | 127.3                  | 22.22561               | -2.43092        | 1              |
| HA7/3                        | OS-HA7/3                     | 114.33                 | 22.9222                | 105.67                 | 14.78411               | 0.952472        | 1              |
| HA7/6                        | NCS/6                        | 96.144                 | 18.5096                | 121.77                 | 33.40748               | -1.926749       | 1              |
| OS-HA7/6                     | NCS/6                        | 129.3                  | 23.10908               | 121.77                 | 33.40748               | 0.5561121       | 1              |
| HA7/6                        | OS-HA7/6                     | 96.144                 | 18.5096                | 129.3                  | 23.10908               | -3.241695       | 0.198          |

\*standard deviation

\*\* t test statistic

**Table S2C.** Statistical significance of Faith's Phylogenetic Diversity values.

| <b>Group 1<br/>(Diet/week)</b> | <b>Group 2<br/>(Diet/week)</b> | <b>Group1<br/>mean</b> | <b>Group1<br/>std*</b> | <b>Group2<br/>mean</b> | <b>Group2<br/>std*</b> | <b>t stat**</b> | <b>p-value</b> |
|--------------------------------|--------------------------------|------------------------|------------------------|------------------------|------------------------|-----------------|----------------|
| NCS/3                          | NCS/1                          | 13.56233               | 1.95248                | 20.20653               | 3.57882                | -4.8893         | 0.066          |
| NCS/6                          | NCS/1                          | 13.43341               | 2.73107                | 20.20653               | 3.57882                | -4.5135         | 0.132          |
| NCS/6                          | NCS/3                          | 13.43341               | 2.73107                | 13.56233               | 1.95248                | -0.1152         | 1              |
| HA7/1                          | HA7/3                          | 19.30618               | 2.02150                | 12.44779               | 2.17346                | 6.9317          | 0.066          |
| HA7/6                          | HA7/1                          | 12.02321               | 1.65788                | 19.30618               | 2.02150                | -8.0690         | 0.066          |
| HA7/6                          | HA7/3                          | 12.02321               | 1.65788                | 12.44779               | 2.17346                | -0.4491         | 1              |
| OS-HA7/1                       | OS-HA7/3                       | 20.08043               | 3.88240                | 11.73642               | 1.18708                | 6.16579         | 0.066          |
| OS-HA7/6                       | OS-HA7/1                       | 12.75765               | 1.49566                | 20.08043               | 3.88240                | -5.2801         | 0.066          |
| OS-HA7/6                       | OS-HA7/3                       | 12.75765               | 1.49566                | 11.73642               | 1.18708                | 1.60444         | 1              |
| HA7/1                          | NCS/1                          | 19.30618               | 2.02150                | 20.20653               | 3.57882                | -0.6571         | 1              |
| OS-HA7/1                       | NCS/1                          | 20.08043               | 3.88240                | 20.20653               | 3.57882                | -0.0716         | 1              |
| HA7/1                          | OS-HA7/1                       | 19.30618               | 2.02150                | 20.08043               | 3.88240                | -0.5306         | 1              |
| HA7/3                          | NCS/3                          | 12.44779               | 2.17346                | 13.56233               | 1.95248                | -1.1444         | 1              |
| OS-HA7/3                       | NCS/3                          | 11.73642               | 1.18708                | 13.56233               | 1.95248                | -2.3972         | 1              |
| HA7/3                          | OS-HA7/3                       | 12.44779               | 2.17346                | 11.73642               | 1.18708                | 0.86174         | 1              |
| HA7/6                          | NCS/6                          | 12.02321               | 1.65788                | 13.43341               | 2.73107                | -1.2697         | 1              |
| OS-HA7/6                       | NCS/6                          | 12.75765               | 1.49566                | 13.43341               | 2.73107                | -0.6510         | 1              |
| HA7/6                          | OS-HA7/6                       | 12.02321               | 1.65788                | 12.75765               | 1.49566                | -0.9602         | 1              |
| OS-HA7/<br>cecal               | NCS/cecal                      | 14.28590               | 1.77195                | 16.47021               | 2.48448                | -2.1473         | 1              |
| OS-HA7/<br>cecal               | HA7/cecal                      | 15.11309               | 1.54492                | 16.47021               | 2.48448                | -1.2730         | 1              |
| HA7/cecal                      | NCS/cecal                      | 15.11309               | 1.54492                | 14.28590               | 1.77195                | 0.98166         | 1              |

\*standard deviation

\*\* t test statistic
